# Supplementary material for: Polyvinyl alcohol/propylene glycol facilitates reversible thermochromism of passive energy-saving flexible wood films at low (brightness) to high (depth) temperatures
Source: Royal Society of Chemistry journal article supplement (doi:10.1039/d3ra06336d), 2023-01-01
Supplement: d3ra06336d1.pdf [file d3ra06336d1.pdf]

## Supporting Information

# Polyvinyl alcohol/propylene glycol facilitates reversible thermochromism of passive energy-saving flexible wood films at low (brightness) to high (depth) temperatures

Zhe Kang Nianrong Feng Dongying Hu\*

State Key Laboratory of Featured Metal Materials and Life-cycle Safety for Composite Structures, MOE Key Laboratory of New Processing Technology for Nonferrous Metals and Materials, and School of Resources, Environment and Materials, Guangxi University, Nanning 530004, China.

\*Corresponding author (Dongying Hu). Tel: +86-771-3232200.

E-mail address: hdygxu@163.com (Dongying Hu)

3526876264@qq.com (Zhe Kang)

1753615250@qq.com (Nianrong Feng)

## 2 Experimental sections

### 2.1 Preparation of delignified eucalyptus wood fiber backbone

The eucalyptus wood chips (EWs) were treated in a mixed solution of 3.0 wt% NaOH/3.0 wt% Na<sub>2</sub>SiO<sub>3</sub>/0.1 wt% MgSO<sub>4</sub>/0.1 wt% DTPA/4.0 wt% H<sub>2</sub>O<sub>2</sub>/89.8 wt% H<sub>2</sub>O, maintained in a water bath at 70 °C for 24 h, in which a certain amount of H<sub>2</sub>O<sub>2</sub> was added every 2 h to ensure a constant H<sub>2</sub>O<sub>2</sub> concentration in the mixed solution. The treated EWs were washed with distilled water to neutrality and freeze-dried to obtain delignified eucalyptus wood fiber backbone (DEWs).

### 2.2 Preparation of binary fatty acid eutectics

In this experiment, a single fatty acid (MA, PA, SA) was chosen as phase change materials. The DSC curves and parameters for endothermic and exothermic processes, as well as the eutectic phase diagrams, mass ratios and phase change temperatures for binary fatty acid eutectic mixtures determined using the Schrader equation, refer to

previous work.<sup>s1</sup> Binary eutectic PCMs (MA-PA, MA-SA, PA-SA) can be obtained by adding theoretically calculated single-component mass ratios, heated at 75 °C and stirred for 30 min to achieve homogeneity.

### 3 Results and Discussion

Table 1 DSC parameters of FE, FEC, and FT-PCMs.

| Binary eutectics | Endothermic process |       |                      | Exothermic process |       |                      |
|------------------|---------------------|-------|----------------------|--------------------|-------|----------------------|
|                  | $T_m$               | $T_p$ | $\Delta H_m$         | $T_s$              | $T_p$ | $\Delta H_s$         |
|                  | (°C)                | (°C)  | (J g <sup>-1</sup> ) | (°C)               | (°C)  | (J g <sup>-1</sup> ) |
| MA-PA            | 46.5                | 52.2  | 196.4                | 43.7               | 38.8  | 193.1                |
| MA-SA            | 46.5                | 50.5  | 203.8                | 41.6               | 35.4  | 197.2                |
| PA-SA            | 58.4                | 61.0  | 239.4                | 52.0               | 46.8  | 236.6                |
| MPR              | 46.7                | 51.6  | 162.2                | 42.4               | 37.7  | 158.4                |
| MSR              | 44.7                | 49.6  | 181.9                | 40.7               | 34.1  | 176.2                |
| PSR              | 55.1                | 59.9  | 212.1                | 51.1               | 46.6  | 209.8                |
| MPG              | 46.1                | 51.3  | 201.1                | 43.2               | 38.0  | 198.7                |
| MSG              | 44.0                | 48.9  | 198.4                | 41.4               | 36.2  | 184.6                |
| PSG              | 54.7                | 60.1  | 221.1                | 51.6               | 46.4  | 219.1                |
| MPR-DEW          | 42.1                | 53.1  | 130.3                | 41.9               | 35.3  | 130.9                |
| MSR-DEW          | 41.7                | 48.9  | 124.5                | 39.5               | 33.3  | 121.3                |
| PSR-DEW          | 54.4                | 61.4  | 149.8                | 50.7               | 45.1  | 149.1                |
| MPG-DEW          | 42.3                | 51.5  | 130.6                | 42.3               | 36.1  | 131.6                |
| MSG-DEW          | 39.8                | 50.9  | 119.1                | 39.8               | 30.0  | 123.0                |
| PSG-DEW          | 55.2                | 60.5  | 143.3                | 51.2               | 46.3  | 142.6                |

Table 2 DSC parameters of FT-PCMs-2 (Red).

| samples | Endothermic process |       |              | Exothermic process |       |              |
|---------|---------------------|-------|--------------|--------------------|-------|--------------|
|         | $T_m$               | $T_p$ | $\Delta H_m$ | $T_s$              | $T_p$ | $\Delta H_s$ |

|              | (°C) | (°C) | (J g <sup>-1</sup> ) | (°C) | (°C) | (J g <sup>-1</sup> ) |
|--------------|------|------|----------------------|------|------|----------------------|
| MPR-DEW-4PVA | 43.0 | 55.7 | 65.94                | 38.0 | 29.1 | 78.91                |
| MPR-DEW-6PVA | 41.6 | 51.2 | 46.59                | 37.6 | 30.7 | 54.31                |
| MPR-DEW-8PVA | 41.8 | 52.0 | 42.59                | 35.8 | 29.4 | 49.14                |
| MSR-DEW-4PVA | 38.7 | 47.9 | 66.99                | 37.8 | 29.9 | 72.43                |
| MSR-DEW-6PVA | 38.6 | 51.5 | 59.82                | 36.6 | 26.8 | 69.05                |
| MSR-DEW-8PVA | 39.2 | 49.0 | 48.1                 | 36.5 | 29.0 | 55.25                |
| PSR-DEW-4PVA | 50.9 | 60.5 | 52.28                | 46.9 | 40.9 | 61.29                |
| PSR-DEW-6PVA | 50.1 | 58.3 | 51.22                | 45.6 | 40.0 | 55.9                 |
| PSR-DEW-8PVA | 52.4 | 61.7 | 49.82                | 45.6 | 37.9 | 58.2                 |

Table 3 DSC parameters of FT-PCMs-2 (Green).

| samples      | Endothermic process |                |                      | Exothermic process |                |                      |
|--------------|---------------------|----------------|----------------------|--------------------|----------------|----------------------|
|              | T <sub>m</sub>      | T <sub>p</sub> | ΔH <sub>m</sub>      | T <sub>s</sub>     | T <sub>p</sub> | ΔH <sub>s</sub>      |
|              | (°C)                | (°C)           | (J g <sup>-1</sup> ) | (°C)               | (°C)           | (J g <sup>-1</sup> ) |
| MPG-DEW-4PVA | 40.3                | 51.1           | 64.07                | 39.1               | 32.5           | 64.40                |
| MPG-DEW-6PVA | 41.1                | 51.3           | 65.85                | 38.5               | 32.5           | 65.24                |
| MPG-DEW-8PVA | 40.9                | 52.8           | 60.78                | 37.3               | 29.3           | 62.26                |
| MSG-DEW-4PVA | 38.3                | 49.7           | 60.68                | 36.0               | 27.5           | 66.08                |
| MSG-DEW-6PVA | 36.6                | 47.4           | 57.41                | 36.0               | 30.0           | 61.23                |
| MSG-DEW-8PVA | 38.9                | 49.6           | 59.93                | 37.2               | 28.5           | 63.10                |
| PSG-DEW-4PVA | 50.7                | 60.2           | 56.92                | 45.3               | 37.5           | 62.31                |
| PSG-DEW-6PVA | 51.9                | 62.2           | 58.40                | 46.2               | 37.2           | 62.63                |

|              |      |      |       |      |      |       |
|--------------|------|------|-------|------|------|-------|
| PSG-DEW-8PVA | 51.1 | 60.1 | 58.12 | 45.1 | 36.3 | 61.14 |
|--------------|------|------|-------|------|------|-------|

Table S4 Color parameters and photographs of FT-PCMs-1 and FT-PCMs-2 (red).

| Samples      | Color parameters before heating |          |          |            |                                                                                     | Color parameters after heating |          |          |            |                                                                                       |
|--------------|---------------------------------|----------|----------|------------|-------------------------------------------------------------------------------------|--------------------------------|----------|----------|------------|---------------------------------------------------------------------------------------|
|              | <i>L</i>                        | <i>a</i> | <i>b</i> | $\Delta E$ | Images                                                                              | <i>L</i>                       | <i>a</i> | <i>b</i> | $\Delta E$ | Images                                                                                |
| MPR-DEW-4PVA | 68.15                           | 33.15    | 0.54     | 75.79      |    | 40.92                          | 45.79    | 10.39    | 62.28      |    |
| MPR-DEW-6PVA | 61.62                           | 41.78    | 0.01     | 74.45      |    | 32.39                          | 55.86    | 6.63     | 64.91      |    |
| MPR-DEW-8PVA | 67.58                           | 34.44    | 3.03     | 75.91      |    | 34.82                          | 52.18    | 8.57     | 63.32      |    |
| MSR-DEW-4PVA | 61.84                           | 34.57    | 2.23     | 70.88      |   | 35.11                          | 57.3     | 2.91     | 67.26      |   |
| MSR-DEW-6PVA | 59.72                           | 41.93    | 1.94     | 73.00      |  | 32.5                           | 62.16    | 9.42     | 70.78      |  |
| MSR-DEW-8PVA | 63.73                           | 37.68    | 2.78     | 74.08      |  | 36.44                          | 59.31    | 8.36     | 70.11      |  |
| PSR-DEW-4PVA | 71.64                           | 26.53    | 4.58     | 76.53      |  | 40.9                           | 54.8     | 6.37     | 68.67      |  |
| PSR-DEW-6PVA | 75.02                           | 27.91    | 4.34     | 80.16      |  | 42.31                          | 56.69    | 5.59     | 70.96      |  |
| PSR-DEW-8PVA | 77.01                           | 26.5     | 5.8      | 81.65      |  | 40.53                          | 45.14    | 6.01     | 60.96      |  |
| MSR-DEW-6    | 30.75                           | 30.01    | -1.81    | 43.01      |  | 46.18                          | 39.76    | -12.54   | 62.21      |  |

Table S5 Color parameters and photographs of FT-PCMs-1 and FT-PCMs-2 (green).

| Samples      | Color parameters before heating |          |          |            |                                                                                     | Color parameters after heating |          |          |            |                                                                                       |
|--------------|---------------------------------|----------|----------|------------|-------------------------------------------------------------------------------------|--------------------------------|----------|----------|------------|---------------------------------------------------------------------------------------|
|              | <i>L</i>                        | <i>a</i> | <i>b</i> | $\Delta E$ | Images                                                                              | <i>L</i>                       | <i>a</i> | <i>b</i> | $\Delta E$ | Images                                                                                |
| MPG-DEW-4PVA | 48.58                           | 0.13     | 12.92    | 50.26      | 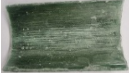   | 33.24                          | -15.09   | 18.71    | 41.02      |    |
| MPG-DEW-6PVA | 31.56                           | -5.13    | 17.41    | 36.41      |    | 33.19                          | -12.2    | 14.81    | 38.33      |    |
| MPG-DEW-8PVA | 44.45                           | -1.44    | 12.98    | 46.33      |    | 35.75                          | -14.7    | 12.71    | 40.69      |    |
| MSG-DEW-4PVA | 39.19                           | 4.52     | 12.62    | 41.42      |   | 20.23                          | 5.73     | 16.96    | 27.01      |   |
| MSG-DEW-6PVA | 45.37                           | -1.62    | 11.54    | 46.84      |  | 20.08                          | -14.9    | 24.89    | 35.3       |  |
| MSG-DEW-8PVA | 32.16                           | 5.45     | 15.5     | 36.12      |  | 20.54                          | -13.3    | 17.98    | 30.37      |  |
| PSG-DEW-4PVA | 50.24                           | 1.75     | 15.19    | 52.52      |  | 30.92                          | -12.7    | 17.57    | 37.75      |  |
| PSG-DEW-6PVA | 49.15                           | -3.51    | 15.31    | 51.6       |  | 39.17                          | -20.8    | 21.36    | 49.25      |  |
| PSG-DEW-8PVA | 51.17                           | 3.94     | 13.82    | 53.15      |  | 33.21                          | -2.73    | 6.06     | 33.86      |  |

---

|           |       |       |      |       |  |       |        |      |       |  |
|-----------|-------|-------|------|-------|--|-------|--------|------|-------|--|
| MSG-DEW-6 | 29.52 | -3.80 | 1.70 | 29.81 |  | 51.74 | -10.88 | 8.81 | 53.60 |  |
|-----------|-------|-------|------|-------|--|-------|--------|------|-------|--|

---

## References

S1 N. Feng, Z. Kang and D. Hu, Solar Energy, 2022, 236, 522-532.
